# Supplementary material
Source: Springer Nature journal article supplement (http://springermedizin.de/resource/supplementary/12874_2011_806_MOESM2_ESM.pdf/9432750)

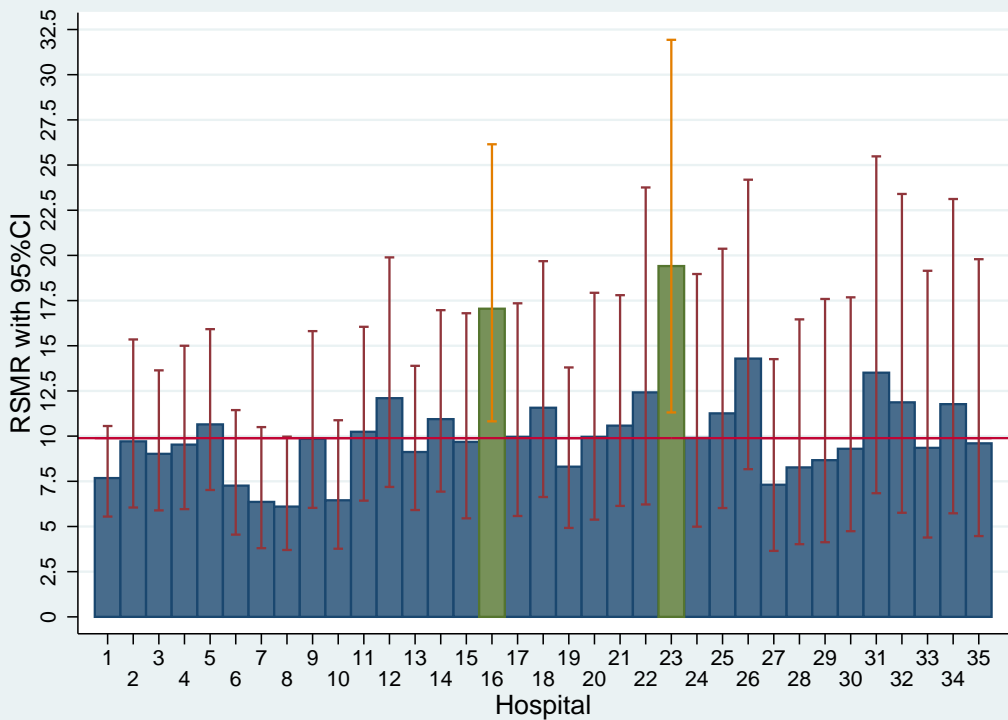

Supplement: MOESM2 [file 9432750]
